# Supplementary material for: Insights into the Host Range, Genetic Diversity, and Geographical Distribution of Jingmenviruses
Source: PubMed Central journal article supplement (PMC6835211; doi:10.1128/msphere.00645-19), 2019-11-06

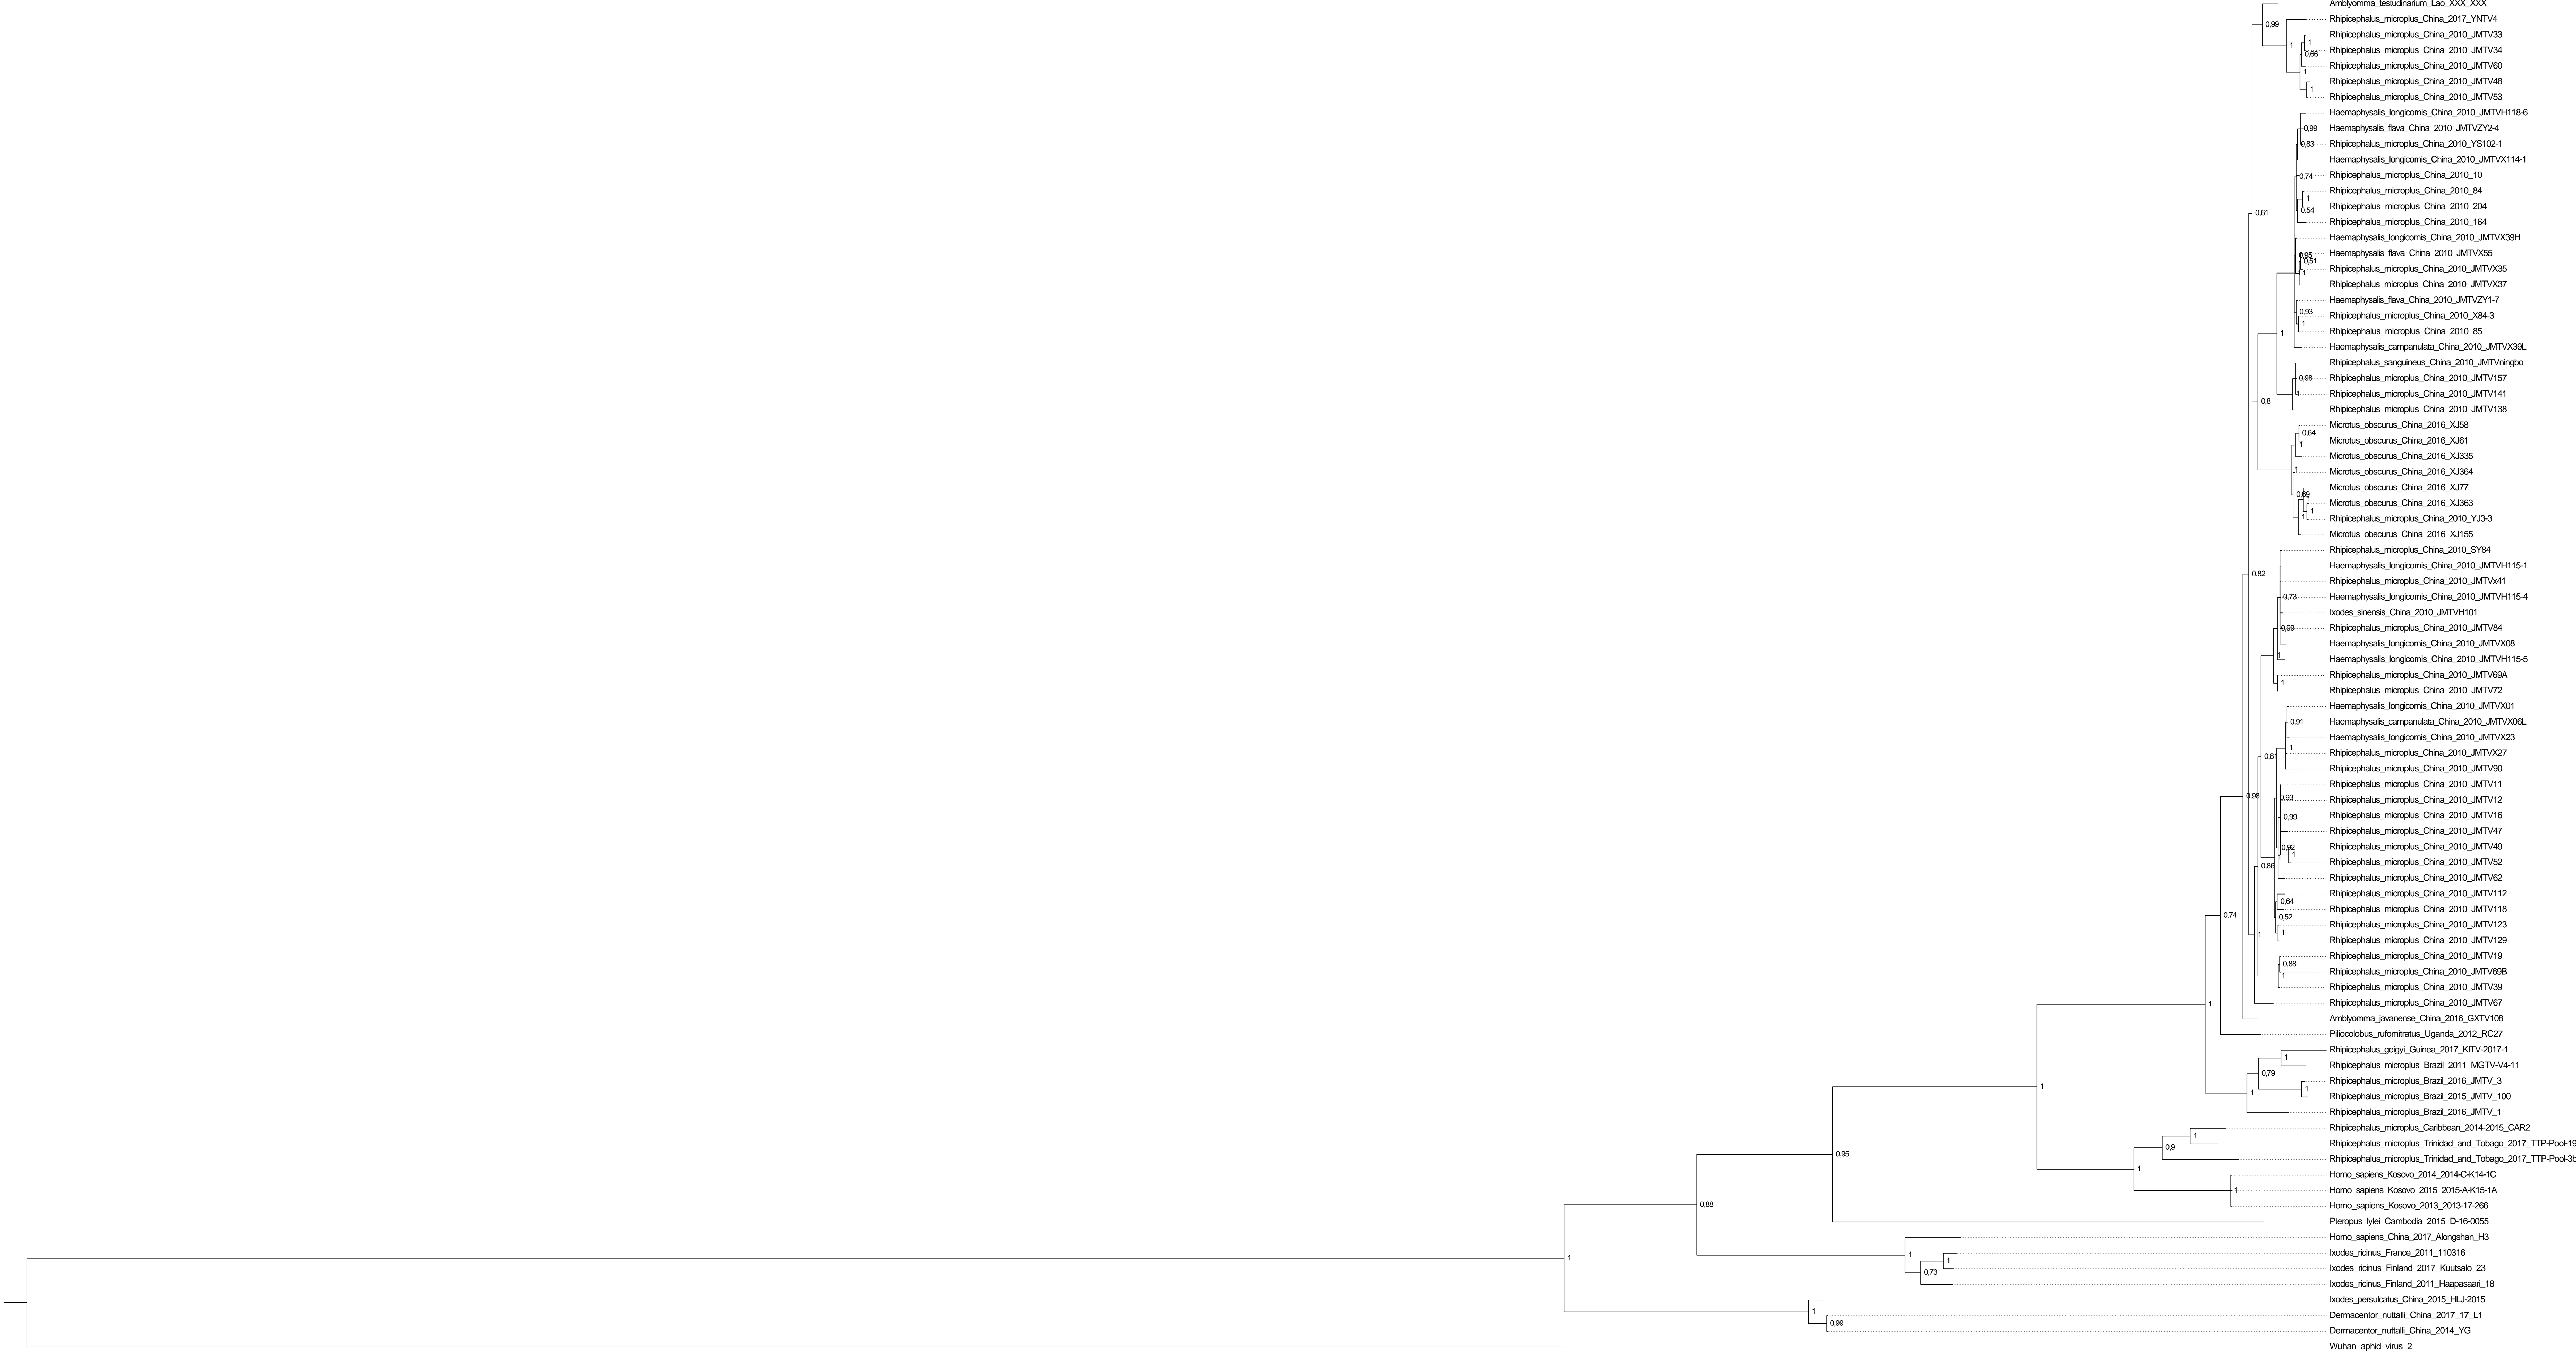

Supplement: mSphere.00645-19-sf002.pdf [file mSphere.00645-19-sf002.pdf]
